# Supplementary material
Source: PubMed Central journal article supplement (PMC8896092)
Supplement: NIHMS1783087-supplement-Supplement_and_Supplementary_Figures.pdf [file NIHMS1783087-supplement-Supplement_and_Supplementary_Figures.pdf]

## **SUPPLEMENTARY INFORMATION**

### **Systematic Identification of Protein Phosphorylation-Mediated Interactions**

Brendan M. Floyd<sup>1</sup>, Kevin Drew<sup>1</sup>, Edward M. Marcotte<sup>1</sup>

1. Department of Molecular Biosciences  
Center for Systems and Synthetic Biology  
The University of Texas at Austin  
Austin, TX 78712, USA

S-1: Supplemental Figure 1 - Elution traces for additional protein complexes.

S-2: Supplemental Figure 2 - Comparison of functional protein phosphorylation studies.

S-3: Supplemental Figure 3 - Additional analysis of scoring methods used for determining the phospho-DIFFRAC hits.

S-4: Supplemental Table 1 - Elution profiles for all identified proteins.

S-4: Supplemental Table 2 - DA z-score and DIFFRAC scores for hits and all identified proteins.

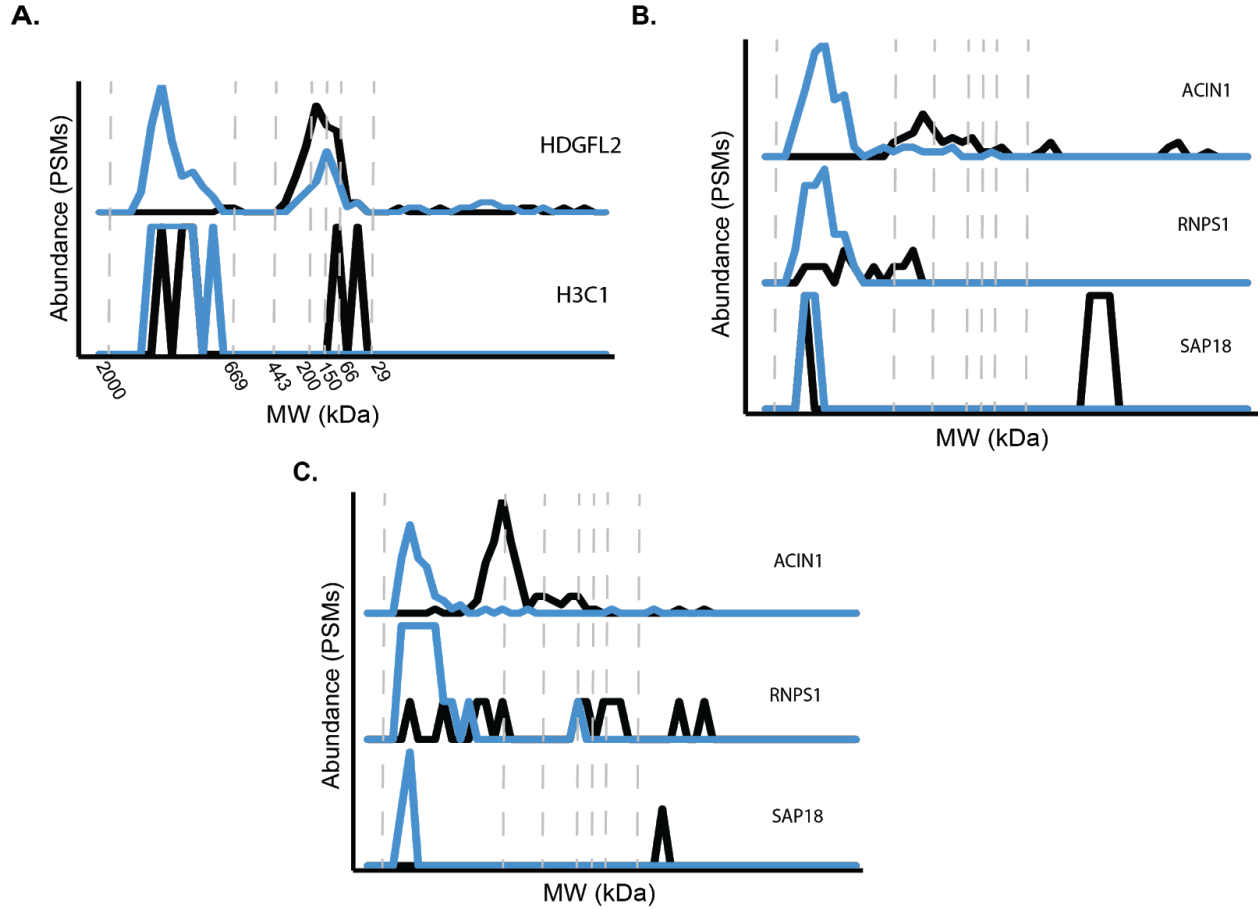

**Supplemental Figure 1.** A) Elution traces for Hepatoma derived growth factor related protein 2 (HDGFL2), top, and histone 3 (H3C1), bottom. B and C) Elution traces for subunits of the ASAP complex from different biological replicates than that in Fig 4E. From top to bottom: Apoptotic chromatin condensation inducer in the nucleus (ACIN1), RNA-binding protein with serine-rich domain 1 (RNPS1), Histone deacetylase complex subunit SAP18 (SAP18).

A.

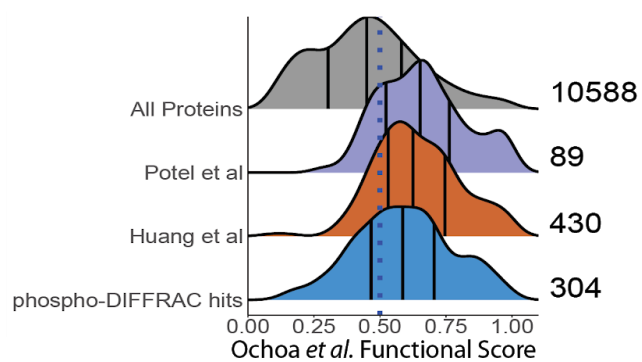

B.

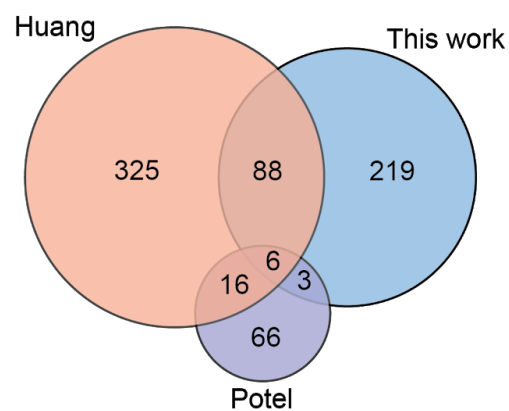

**Supplemental Figure 2.** A) Protein functional score distribution for all proteins with functional scores (grey), hits from the study by Potel *et al.* (purple), hits from the study by Huang *et al.* (orange) and hits from this study (blue). B) Venn diagram of functional phosphoproteins identified in 3 different experimental studies.

**A.**

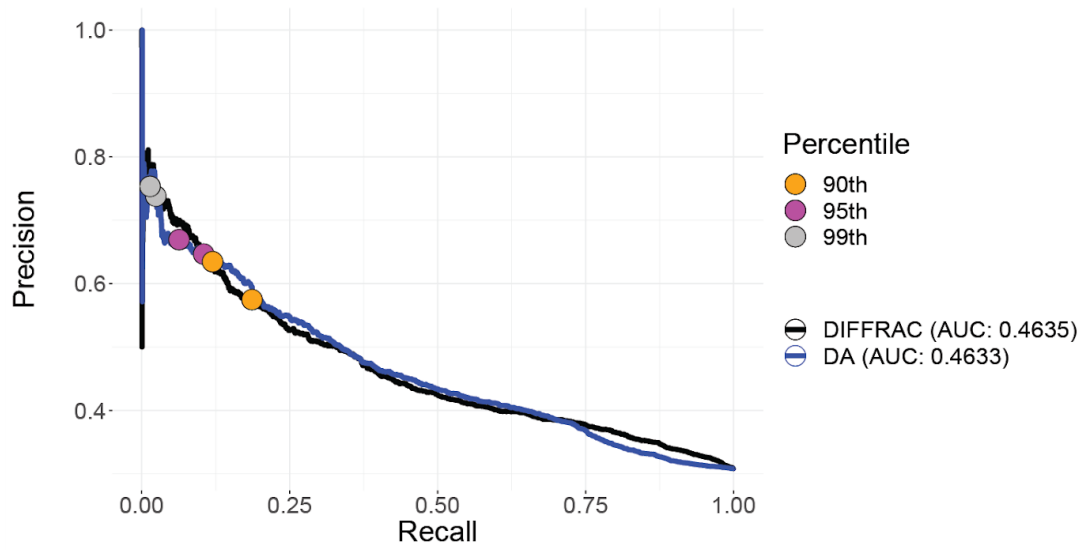

**B.**

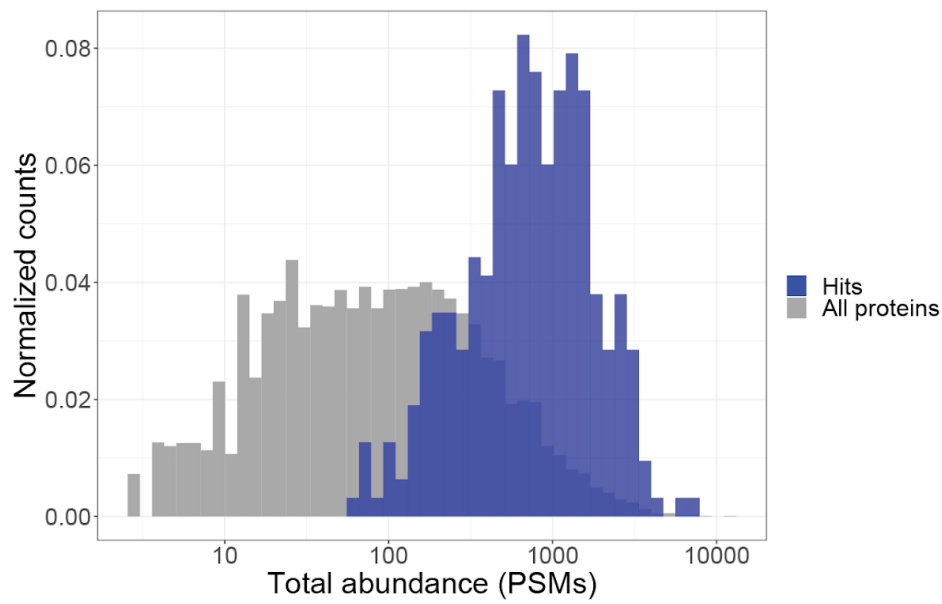

**Supplemental Figure 3.** A) Abundance distribution for proteins identified in the 3 biological replicates in this study. B) Precision-recall curve of the two scoring methods used in this study and with points highlighted indicating the 90th (orange), 95th (magenta), and 99th (grey) percentile of each score.

**Supplemental Table 1.** Protein elution profiles for phosphatase-treated and control samples across all three replicates and fractions, reporting peptide spectral matches (PSMs) per protein per biochemical fraction.

**Supplemental Table 2.** DA z-score and DIFFRAC scores for phospho-DIFFRAC hits and all other proteins identified in the study, as well as per-fraction DA z-scores.
